# Supplementary material for: Forelimb bone curvature in terrestrial and arboreal mammals
Source: PeerJ. 2017 Apr 26;5:e3229. doi: 10.7717/peerj.3229 (PMC5408721; doi:10.7717/peerj.3229)
Supplement: Supplemental Information 2 [file peerj-05-3229-s002.xlsx]

## Sheet: individual data
loco	locomotion	genus	species	museum	mus #	chord	curvature	count	mean		Chord is the length in mm of the measured curve
1	Arboreal	Dactylopsila	magalura	AM	M32374	36.87	-0.101129				Curvature is the largest deviation from the chord (subtense) divided by the chord
1	Arboreal	Dactylopsila	magalura	AM	M9488	32.14	-0.0778872				caudal curves are negative here, but have been changed to positive in the manuscript
1	Arboreal	Dactylopsila	magalura	AM	M9489	28.45	-0.0677966	3	-0.0822709
1	Arboreal	Dactylopsila	trivigata	AM	M38910	29.56	-0.102564				These species names are those used as labels in the morphologika files
1	Arboreal	Dactylopsila	trivigata	AM	M41272	33.31	-0.0609631				Updated species names as shown in table 1 are shown in the species means sheet
1	Arboreal	Dactylopsila	trivigata	AM	M42750	35.38	-0.075344
1	Arboreal	Dactylopsila	trivigata	AM	M42751	35.57	-0.0800351				Key to museums
1	Arboreal	Dactylopsila	trivigata	AM	M9851	33.09	-0.0825834	5	-0.0802979		WAM		Western Australian Museum
1	Arboreal	Dendrolagus	lumholtzi	WAM	M21009	86.71	-0.0624227				MV		Museum Victoria
1	Arboreal	Dendrolagus	lumholtzi	MV	C7111	90.31	-0.0619355				AM		Australian Museum
1	Arboreal	Dendrolagus	lumholtzi	MV	C7127	98.43	-0.0604113				SAM		South Australian Museum
1	Arboreal	Dendrolagus	lumholtzi	AM	M001	46.78	-0.0740105	4	-0.064695		US		University of Sydney
1	Arboreal	Dendrolagus	matschiei	WAM	M21013	106.61	-0.0524608	1	-0.0524608
1	Arboreal	Didelphis	californica	SAM	HM559	61.82	-0.0831601	1	-0.0831601
1	Arboreal	Gymnobelideus	leadbeateri	AM	M24887	22.75	-0.0938967	1	-0.0938967
1	Arboreal	Petauroides	volans	AM	M002	54.12	-0.0408056
1	Arboreal	Petauroides	volans	MV	C10235	77.8	-0.0501285
1	Arboreal	Petauroides	volans	MV	C25803	68.77	-0.0509703
1	Arboreal	Petauroides	volans	MV	C25811	74.31	-0.0598726
1	Arboreal	Petauroides	volans	MV	C25812	69.23	-0.0668544
1	Arboreal	Petauroides	volans	MV	C25814	73.09	-0.043923
1	Arboreal	Petauroides	volans	MV	C26150	77.66	-0.0598194
1	Arboreal	Petauroides	volans	MV	C27723	80.28	-0.0510602
1	Arboreal	Petauroides	volans	MV	C3889	70.3	-0.0644865	9	-0.0542134
1	Arboreal	Petaurus	australis	AM	M35441	51.63	-0.0536013
1	Arboreal	Petaurus	australis	AM	M37956	53.76	-0.0662461	2	-0.0599237
1	Arboreal	Petaurus	norfolcensis	AM	M10373	34.01	-0.0616379
1	Arboreal	Petaurus	norfolcensis	AM	M31834	34.1	-0.0670175
1	Arboreal	Petaurus	norfolcensis	AM	M32998	34.33	-0.0825253
1	Arboreal	Petaurus	norfolcensis	AM	M35571	35.51	-0.0581963
1	Arboreal	Petaurus	norfolcensis	AM	M35572	34.33	-0.0603625
1	Arboreal	Petaurus	norfolcensis	AM	M35574	34.24	-0.072528
1	Arboreal	Petaurus	norfolcensis	AM	M35704	37.34	-0.0779119
1	Arboreal	Petaurus	norfolcensis	AM	M35705	37.62	-0.0577689
1	Arboreal	Petaurus	norfolcensis	AM	M35705	37.37	-0.0639371
1	Arboreal	Petaurus	norfolcensis	AM	M43627	33.89	-0.0721872
1	Arboreal	Petaurus	norfolcensis	AM	M47786	38.23	-0.0638298
1	Arboreal	Petaurus	norfolcensis	AM	M9691	36.73	-0.0627563	12	-0.0667216
1	Arboreal	Phalanger	maculatus	WAM	M10907	45.67	-0.0818092
1	Arboreal	Phalanger	maculatus	WAM	M11943	103.13	-0.0407801	2	-0.0612947
1	Arboreal	Phalanger	carmelitae	AM	M30726	57.39	-0.082612
1	Arboreal	Phalanger	carmelitae	AM	M30731	56.2	-0.0882257	2	-0.0854188
1	Arboreal	Phalanger	intercastellanus	AM	S1892	54.18	-0.0774369
1	Arboreal	Phalanger	intercastellanus	AM	S1893	46.42	-0.089077	2	-0.0832569
1	Arboreal	Phalanger	orientalis	AM	A11250	52.58	-0.097907
1	Arboreal	Phalanger	orientalis	AM	M17206	49.58	-0.0853965	2	-0.0916517
1	Arboreal	Phalanger	sericeus	AM	M30752	62.48	-0.0693296	1	-0.0693296
1	Arboreal	Phascogale	tapoatafa	AM	M17983	26.65	-0.0570652
1	Arboreal	Phascogale	tapoatafa	AM	M7522	31.38	-0.0443621	2	-0.0507137
1	Arboreal	Phascolarctos	cinerus	MV	C22285	116.26	-0.0745342
1	Arboreal	Phascolarctos	cinerus	MV	C26355	77.64	-0.0590278
1	Arboreal	Phascolarctos	cinerus	MV	C28651	146.56	-0.077473
1	Arboreal	Phascolarctos	cinerus	MV	C28652	136.84	-0.0817518
1	Arboreal	Phascolarctos	cinerus	MV	C28655	141.18	-0.0565247
1	Arboreal	Phascolarctos	cinerus	MV	C28659	96.77	-0.0915751
1	Arboreal	Phascolarctos	cinerus	MV	C37640	95.61	-0.0552462
1	Arboreal	Phascolarctos	cinerus	MV	C6755	109.07	-0.0780952	8	-0.0717785
1	Arboreal	Pseudocheirus	occidentalis	WAM	M21025	52.66	-0.0656469
1	Arboreal	Pseudocheirus	occidentalis	WAM	M21234	45.24	-0.0786517
1	Arboreal	Pseudocheirus	occidentalis	WAM	M7202	53.66	-0.0635979
1	Arboreal	Pseudocheirus	occidentalis	WAM	M9875	42.02	-0.0831502	4	-0.0727617
1	Arboreal	Pseudocheirus	peregrinus	WAM	M9870	44.36	-0.0803738	1	-0.0803738
1	Arboreal	Trichosurus	caninus	AM	M33831	67.43	-0.0936107
1	Arboreal	Trichosurus	caninus	AM	M33832	68.14	-0.0830953
1	Arboreal	Trichosurus	caninus	AM	M35762	65.78	-0.08	3	-0.0855687
1	Arboreal	Trichosurus	vulpeculaarnhemensis	WAM	M19550	46.95	-0.0626003
1	Arboreal	Trichosurus	vulpeculavulpecula	WAM	M6595	48.27	-0.0659028
1	Arboreal	Trichosurus	vulpeculavulpecula	WAM	M6637	49.8	-0.08
1	Arboreal	Trichosurus	vulpeculavulpecula	WAM	M6640	43.78	-0.0677496
1	Arboreal	Trichosurus	vulpeculavulpecula	AM	M6641	48.99	-0.0561122
1	Arboreal	Trichosurus	vulpeculavulpecula	WAM	M6646	49.57	-0.0665792
1	Arboreal	Trichosurus	vulpeculavulpecula	WAM	M6658	44.3	-0.0613027
1	Arboreal	Trichosurus	vulpeculavulpecula	WAM	M6774	48.81	-0.0636775
1	Arboreal	Trichosurus	vulpeculafuliginosus	MV	C10746	82.04	-0.0873016
1	Arboreal	Trichosurus	vulpeculafuliginosus	MV	C10746	66.02	-0.088616
1	Arboreal	Trichosurus	vulpeculafuliginosus	MV	C3208	66.34	-0.0907591
1	Arboreal	Trichosurus	vulpeculafuliginosus	MV	C3208	74.94	-0.0888158
1	Arboreal	Trichosurus	vulpeculafuliginosus	MV	C3235	75.92	-0.0685235
1	Arboreal	Trichosurus	vulpeculafuliginosus	MV	R3031	62.4	-0.075735
1	Arboreal	Trichosurus	vulpeculafuliginosus	MV	R3037	72.68	-0.0832046
1	Arboreal	Trichosurus	vulpeculafuliginosus	MV	R7371	74.57	-0.0929919	16	-0.074992
2	Semiarboreal	Dasyurus	albopunctatus	AM	M23576	36.5	-0.150775
2	Semiarboreal	Dasyurus	albopunctatus	AM	M23604	35.96	-0.0853333
2	Semiarboreal	Dasyurus	albopunctatus	AM	M23604	49.51	-0.0836386	3	-0.106582
2	Semiarboreal	Dasyurus	maculatus	AM	A6379	75.64	-0.0995745
2	Semiarboreal	Dasyurus	maculatus	AM	B5449	69.41	-0.100041
2	Semiarboreal	Dasyurus	maculatus	MV	C14717	61.16	-0.124705
2	Semiarboreal	Dasyurus	maculatus	MV	C17696	67.47	-0.118299
2	Semiarboreal	Dasyurus	maculatus	MV	C17727	63.33	-0.120385
2	Semiarboreal	Dasyurus	maculatus	MV	C17757	63	-0.11878
2	Semiarboreal	Dasyurus	maculatus	MV	C25985	66.72	-0.112153
2	Semiarboreal	Dasyurus	maculatus	MV	C26657	62.1	-0.109342
2	Semiarboreal	Dasyurus	maculatus	MV	C35613	59.96	-0.106756
2	Semiarboreal	Dasyurus	maculatus	MV	C5778	53.5	-0.114851
2	Semiarboreal	Dasyurus	maculatus	MV	C6108	47.99	-0.0838414
2	Semiarboreal	Dasyurus	maculatus	AM	M11137	69.64	-0.105494
2	Semiarboreal	Dasyurus	maculatus	AM	M23603	67.49	-0.11641
2	Semiarboreal	Dasyurus	maculatus	AM	M725	74.49	-0.101958
2	Semiarboreal	Dasyurus	maculatus	AM	M9798	69.53	-0.0849272
2	Semiarboreal	Dasyurus	maculatus	AM	S1146	78.77	-0.112684
2	Semiarboreal	Dasyurus	maculatus	AM	S1560	65.82	-0.10045
2	Semiarboreal	Dasyurus	maculatus	AM	S1560	66.48	-0.0987483
2	Semiarboreal	Dasyurus	maculatus	AM	S1787	69.51	-0.0960877
2	Semiarboreal	Dasyurus	maculatus	AM	S497	62.79	-0.0780781
2	Semiarboreal	Dasyurus	maculatus	AM	S879	69.64	-0.103198	21	-0.105084
3	Terrestrial	Dasycercus	cristicuda	SAM	M3706	28.05	-0.120738	1	-0.120738
3	Terrestrial	Dasyuroides	byrnei	AM	M7519	31.67	-0.082153
3	Terrestrial	Dasyuroides	byrnei	AM	M18284	30.7	-0.109211	2	-0.0956819
3	Terrestrial	Dasyurus	geoffroii	WAM	M6922	50.55	-0.120081
3	Terrestrial	Dasyurus	geoffroii	WAM	M6735	45.96	-0.102258
3	Terrestrial	Dasyurus	geoffroii	WAM	M6582	43.22	-0.104924
3	Terrestrial	Dasyurus	geoffroii	WAM	M6582	56.4	-0.104361
3	Terrestrial	Dasyurus	geoffroii	WAM	M6941	36.94	-0.074502	5	-0.101225
3	Terrestrial	Dasyurus	hallacatus	WAM	M7863	48.78	-0.0910931
3	Terrestrial	Dasyurus	hallacatus	WAM	M3651	47.13	-0.0804124
3	Terrestrial	Dasyurus	hallacatus	WAM	m6966	39.94	-0.0985003
3	Terrestrial	Dasyurus	hallacatus	WAM	M22480	50.39	-0.0547564
3	Terrestrial	Dasyurus	hallacatus	AM	M4029	42.88	-0.0828307
3	Terrestrial	Dasyurus	hallacatus	AM	M24653	36.88	-0.0837209
3	Terrestrial	Dasyurus	hallacatus	MV	C26501	36.43	-0.0720461
3	Terrestrial	Dasyurus	hallacatus	MV	C684	42.96	-0.0842216	8	-0.0809477
3	Terrestrial	Dasyurus	viverrinus	WAM	M21230	48.16	-0.094087
3	Terrestrial	Dasyurus	viverrinus	AM	M2086	31.57	-0.0896643
3	Terrestrial	Dasyurus	viverrinus	AM	M7222	46.54	-0.117764
3	Terrestrial	Dasyurus	viverrinus	AM	M1698	52.13	-0.114532
3	Terrestrial	Dasyurus	viverrinus	MV	R2585	54.4	-0.0982907
3	Terrestrial	Dasyurus	viverrinus	MV	R2368	47.26	-0.0868052
3	Terrestrial	Dasyurus	viverrinus	MV	C31527	76.5	-0.0823029
3	Terrestrial	Dasyurus	viverrinus	MV	C17714	55.47	-0.100941
3	Terrestrial	Dasyurus	viverrinus	MV	C6080	45.18	-0.136771	9	-0.102351
3	Terrestrial	Echymipera	kalubu	AM	M24591	42.35	-0.0953437
3	Terrestrial	Echymipera	kalubu	AM	M24590	42.2	-0.0722892	2	-0.0838164
3	Terrestrial	Isoodon	auratusbarrowensis	WAM	M19076	34.25	-0.0816206	1	-0.0816206
3	Terrestrial	Isoodon	macrourus	WAM	M15824	47.24	-0.0867769
3	Terrestrial	Isoodon	macrourus	WAM	M22082	47.16	-0.0794337
3	Terrestrial	Isoodon	macrourus	WAM	M19872	39.44	-0.0665499	3	-0.0775868
3	Terrestrial	Isoodon	obesulus	AM	M11135	31.26	-0.0992868
3	Terrestrial	Isoodon	obselusfusciventer	WAM	M6560	43.63	-0.0799691
3	Terrestrial	Isoodon	obesulusfusciventer	WAM	M6929	52.06	-0.0909091
3	Terrestrial	Isoodon	obesulusfusciventer	WAM	M6770	51.22	-0.0662879
3	Terrestrial	Isoodon	obesulusfusciventer	WAM	M6912	52.14	-0.10101	5	-0.0874926
3	Terrestrial	Lasiorhinus	latifrons	MV	C22355	103.31	-0.0596954
3	Terrestrial	Lasiorhinus	latifrons	MV	C22340	101.77	-0.0951977
3	Terrestrial	Lasiorhinus	latifrons	MV	C6708	94.43	-0.087324	3	-0.080739
3	Terrestrial	Macrotis	lagotis	WAM	M14370	47.97	-0.14614
3	Terrestrial	Macrotis	lagotis	WAM	M10924	49.71	-0.120904
3	Terrestrial	Macrotis	lagotis	WAM	M15935	41.54	-0.115294
3	Terrestrial	Macrotis	lagotis	WAM	M6522	55.68	-0.105263	4	-0.1219
3	Terrestrial	Microperorycytes	longicauda	AM	M37996	30.81	-0.0521472
3	Terrestrial	Microperorycytes	longicauda	AM	M30734	41.1	-0.0825472	2	-0.0673472
3	Terrestrial	Myrecobius	fasciatus	WAM	M40551	33.01	-0.0679871	1	-0.0679871
3	Terrestrial	Perameles	gunnii	MV	C8188	40.27	-0.123411
3	Terrestrial	Perameles	gunnii	MV	C21584	37.85	-0.12783
3	Terrestrial	Perameles	gunnii	MV	C32881	41.66	-0.115419
3	Terrestrial	Perameles	gunnii	WAM	M16590	43.4	-0.100629	4	-0.116822
3	Terrestrial	Perameles	nasuta	AM	M8994	46.87	-0.0840517
3	Terrestrial	Perameles	nasuta	AM	S1073	42.28	-0.0840924
3	Terrestrial	Perameles	nasuta	AM	S1074	48.32	-0.072475
3	Terrestrial	Perameles	nasuta	AM	M32983	50.99	-0.0893994
3	Terrestrial	Perameles	nasuta	AM	M11238	51.53	-0.089077
3	Terrestrial	Perameles	nasuta	AM	S1065	45.79	-0.0912951
3	Terrestrial	Perameles	nasuta	AM	M35409	37.82	-0.0752427
3	Terrestrial	Perameles	nasuta	AM	M33610	38.95	-0.087748
3	Terrestrial	Perameles	nasuta	AM	M35408	38.23	-0.102235
3	Terrestrial	Perameles	nasuta	AM	S1072	43.87	-0.0951339
3	Terrestrial	Perameles	nasuta	MV	C35943	40.57	-0.0957447
3	Terrestrial	Perameles	nasuta	MV	C18497	34.32	-0.111465
3	Terrestrial	Perameles	nasuta	MV	C26608	43.79	-0.0953501
3	Terrestrial	Perameles	nasuta	MV	C7772	47.65	-0.100147	14	-0.0909612
3	Terrestrial	Phalanger	gymnotis	AM	M21907	57.93	-0.0838277	1	-0.0838277
3	Terrestrial	Sarcophilus	harrisii	MV	R2993	77.84	-0.141259
3	Terrestrial	Sarcophilus	harrisii	MV	C6245	94.69	-0.158753
3	Terrestrial	Sarcophilus	harrisii	MV	R1552	82.45	-0.147005
3	Terrestrial	Sarcophilus	harrisii	MV	C6233	84.89	-0.149537
3	Terrestrial	Sarcophilus	harrisii	MV	C6264	105.38	-0.137976
3	Terrestrial	Sarcophilus	harrisii	MV	C6256	84.99	-0.132872
3	Terrestrial	Sarcophilus	harrisii	WAM	M16593	100.82	-0.123693
3	Terrestrial	Sarcophilus	harrisii	WAM	M16592	105.47	-0.120301
3	Terrestrial	Sarcophilus	harrisii	WAM	M8836	104.02	-0.106277	9	-0.135297
3	Terrestrial	Thylocinus	cynocephalus	AM	M1957	91.19	-0.0867606
3	Terrestrial	Thylocinus	cynocephalus	AM	M1959	80.34	-0.0942818
3	Terrestrial	Thylocinus	cynocephalus	AM	M4940	74.74	-0.129742
3	Terrestrial	Thylocinus	cynocephalus	AM	M1960	78.36	-0.089436	4	-0.100055
3	Terrestrial	Vombatus	ursinus	MV	C6652	76.11	-0.0870601
3	Terrestrial	Vombatus	ursinus	MV	C9479	98.51	-0.0797833
3	Terrestrial	Vombatus	ursinus	MV	C9480	122.78	-0.129281
3	Terrestrial	Vombatus	ursinus	WAM	M55232	119.88	-0.0718951	4	-0.0920048
								187

## Sheet: spec means
Corrected as in table 1		Humeral data means for 41 marsupial species							body mass
genus			locomotion	genus	species	count	curvature	loco	min	max	mean	abs curve
Dactylopsila	magalura		Arboreal	Dactylopsila	magalura	3	-0.0822709	1	0.246	0.39	0.318	0.0822709
Dactylopsila	trivigata		Arboreal	Dactylopsila	trivigata	5	-0.0802979	1	0.246	0.39	0.318	0.0802979
Dendrolagus	bennettianus
Dendrolagus	lumholtzi		Arboreal	Dendrolagus	lumholtzi	4	-0.064695	1	6.7	10	8.35	0.064695
Dendrolagus	matschiei		Arboreal	Dendrolagus	matschiei	1	-0.0524608	1	6.7	10	8.35	0.0524608
Didelphis	virginiana		Arboreal	Didelphis	californica	1	-0.0831601	1	2	5.5	3.75	0.0831601
Gymnobelideus	leadbeateri		Arboreal	Gymnobelideus	leadbeateri	1	-0.0938967	1	0.065	0.12	0.0925	0.0938967
Petauroides	volans		Arboreal	Petauroides	volans	9	-0.0542134	1	1.2	1.5	1.35	0.0542134
Petaurus	australis		Arboreal	Petaurus	australis	2	-0.0599237	1	0.435	0.7	0.5675	0.0599237
Petaurus	norfolcensis		Arboreal	Petaurus	norfolcensis	12	-0.0667216	1	0.435	0.7	0.5675	0.0667216
Phalanger	maculatus		Arboreal	Phalanger	maculatus	2	-0.0612947	1	3	7	5	0.0612947
Phalanger	carmelitae		Arboreal	Phalanger	carmelitae	2	-0.0854188	1	1	1.88	1.44	0.0854188
Phalanger	mimicus		Arboreal	Phalanger	intercastellanus	2	-0.0832569	1	1	1.88	1.44	0.0832569
Phalanger	orientalis		Arboreal	Phalanger	orientalis	2	-0.0916517	1	1	1.88	1.44	0.0916517
Phalanger	sericeus		Arboreal	Phalanger	sericeus	1	-0.0693296	1	1	1.88	1.44	0.0693296
Phascogale	tapoatafa		Arboreal	Phascogale	tapoatafa	2	-0.0507137	1	0.1	0.23	0.165	0.0507137
Phascolarctos	cinerus		Arboreal	Phascolarctos	cinerus	8	-0.0717785	1	4	15	9.5	0.0717785		ttests	1v2	1v3	2v1
Pseudocheirus	occidentalis		Arboreal	Pseudocheirus	occidentalis	4	-0.0727617	1	0.7	1.5	1.1	0.0727617			0.00240883	0.000188334	0.415114
Pseudocheirus	peregrinus		Arboreal	Pseudocheirus	peregrinus	1	-0.0803738	1	0.7	1.5	1.1	0.0803738
Trichosurus	caninus		Arboreal	Trichosurus	caninus	3	-0.0855687	1	1.3	5	3.15	0.0855687
Trichosurus	vulpecula		Arboreal	Trichosurus	vulpeculafuliginosus	16	-0.074992	1	1.3	5	3.15	0.074992
Dasyurus	albopunctatus		Semiarboreal	Dasyurus	albopunctatus	3	-0.106582	2	0.4	0.6	0.5	0.106582
Dasyurus	maculatus		Semiarboreal	Dasyurus	maculatus	21	-0.105084	2	2	3	2.5	0.105084
Dasycercus	cristicuda		Terrestrial	Dasycercus	cristicuda	1	-0.120738	3	0.06	0.17	0.115	0.120738
Dasyuroides	byrnei		Terrestrial	Dasyuroides	byrnei	2	-0.0956819	3	0.07	0.14	0.105	0.0956819
Dasyurus	geoffroii		Terrestrial	Dasyurus	geoffroii	5	-0.101225	3	0.45	0.65	0.55	0.101225
Dasyurus	hallacatus		Terrestrial	Dasyurus	hallacatus	8	-0.0809477	3	0.4	0.6	0.5	0.0809477
Dasyurus	viverrinus		Terrestrial	Dasyurus	viverrinus	9	-0.102351	3	0.6	1.55	1.075	0.102351
Echymipera	kalubu		Terrestrial	Echymipera	kalubu	2	-0.0838164	3	0.5	2	1.25	0.0838164
Isoodon	auratus		Terrestrial	Isoodon	auratusbarrowensis	1	-0.0816206	3	1.1	1.4	1.25	0.0816206
Isoodon	macrourus		Terrestrial	Isoodon	macrourus	3	-0.0775868	3	1.2	1.6	1.4	0.0775868
Isoodon	obesulus		Terrestrial	Isoodon	obesulusfusciventer	5	-0.0874926	3	1.1	1.4	1.25	0.0874926
Lasiorhinus	latifrons		Terrestrial	Lasiorhinus	latifrons	3	-0.080739	3	19	32	25.5	0.080739
Macrotis	lagotis		Terrestrial	Macrotis	lagotis	4	-0.1219	3	0.3	1.6	0.95	0.1219
Peroryctes	longicauda		Terrestrial	Microperorycytes	longicauda	2	-0.0673472	3	0.38	0.45	0.415	0.0673472
Myrecobius	fasciatus		Terrestrial	Myrecobius	fasciatus	1	-0.0679871	3	0.275	0.45	0.3625	0.0679871
Perameles	gunnii		Terrestrial	Perameles	gunnii	4	-0.116822	3	0.45	0.9	0.675	0.116822
Perameles	nasuta		Terrestrial	Perameles	nasuta	15	-0.0989323	3	0.85	1.1	0.975	0.0989323
Phalanger	gymnotis		Terrestrial	Phalanger	gymnotis	1	-0.0838277	3	1.46	4	2.73	0.0838277
Sarcophilus	harrisii		Terrestrial	Sarcophilus	harrisii	9	-0.135297	3	4.1	11	7.55	0.135297
Thylocinus	cynocephalus		Terrestrial	Thylocinus	cynocephalus	4	-0.100055	3	10	16	13	0.100055
Vombatus	ursinus		Terrestrial	Vombatus	ursinus	4	-0.0920048	3	15	35	25	0.0920048
