# Supplementary material for: Forelimb bone curvature in terrestrial and arboreal mammals
Source: PeerJ. 2017 Apr 26;5:e3229. doi: 10.7717/peerj.3229 (PMC5408721; doi:10.7717/peerj.3229)
Supplement: Supplemental Information 4 [file peerj-05-3229-s004.xlsx]

## Sheet: individual data
Loco	Locomotion	Genus	Species	Museum	mus #	Chord	Curvature	n	mean curve		Chord is the length in mm of the measured curve
1	Arboreal	Dactylopsila	trivigata	AM	M9851	38.36	-0.0221328	1	-0.0221328		Curvature is the largest deviation from the chord (subtense) divided by the chord
1	Arboreal	Dendrolagus	bennettianus	AM	M01	50	-0.0359043	1	-0.0359043		negative curvature is cranially curved (ulna have positive and negative curves)
1	Arboreal	Dendrolagus	lumholtzi	MV	C7111	88.8	-0.0285872
1	Arboreal	Dendrolagus	lumholtzi	MV	C7127	91.02	-0.0263888				These species names are those used as labels in the morphologika files
1	Arboreal	Dendrolagus	lumholtzi	WAM	M21009	77.77	-0.059322	3	-0.0380993		Updated species names as show in table 1 are shown in the species means sheet
1	Arboreal	Dendrolagus	matschiei	WAM	M21013	96.22	-0.0339734	1	-0.0339734
1	Arboreal	Didelphys	californica	SAM	HM559	60	-0.0121365	1	-0.0121365
1	Arboreal	Gymnobelideus	leadbeateri	AM	M24887	26.2	-0.0318841	1	-0.0318841		Key to museums
1	Arboreal	Petauroides	volans	MV	C10235	64.13	0.0179257				WAM		Western Australian Museum
1	Arboreal	Petauroides	volans	MV	C25803	66.61	0.0241423				MV		Museum Victoria
1	Arboreal	Petauroides	volans	MV	C25811	67.61	-0.0138568				AM		Australian Museum
1	Arboreal	Petauroides	volans	MV	C25812	61.81	0.0233766				SAM		South Australian Museum
1	Arboreal	Petauroides	volans	MV	C25814	66.82	-0.0158178				US		University of Sydney
1	Arboreal	Petauroides	volans	MV	C26150	71.23	0.0204313
1	Arboreal	Petauroides	volans	MV	C27723	69.38	0.015897
1	Arboreal	Petauroides	volans	AM	M002	44.14	0.0185464	8	0.0113306
1	Arboreal	Petaurus	australis	AM	M35441	65.83	-0.030837
1	Arboreal	Petaurus	australis	AM	M37956	66.71	-0.0252903	2	-0.0280637
1	Arboreal	Petaurus	norfolcensis	AM	M10373	41.63	-0.0165818
1	Arboreal	Petaurus	norfolcensis	AM	M31834	49.29	-0.0210843
1	Arboreal	Petaurus	norfolcensis	AM	M32998	45.65	0.0179739
1	Arboreal	Petaurus	norfolcensis	AM	M35571	44.6	0.0180624
1	Arboreal	Petaurus	norfolcensis	AM	M35572	43.49	-0.0332737
1	Arboreal	Petaurus	norfolcensis	AM	M35574	40.65	-0.0201249
1	Arboreal	Petaurus	norfolcensis	AM	M35704	45.54	-0.0117714
1	Arboreal	Petaurus	norfolcensis	AM	M35705	46.57	0.0103706
1	Arboreal	Petaurus	norfolcensis	AM	M35705	46.64	-0.0223642
1	Arboreal	Petaurus	norfolcensis	AM	M43627	44.11	-0.0266998
1	Arboreal	Petaurus	norfolcensis	AM	M47786	47.4	-0.0265112
1	Arboreal	Petaurus	norfolcensis	AM	M9691	45.04	-0.0262562	12	-0.0131884
1	Arboreal	Phalanger	maculatus	WAM	M13423	88.61	-0.0423899	1	-0.0423899
1	Arboreal	Phalanger	carmelitae	AM	M30726	53.47	-0.0278491	1	-0.0278491
1	Arboreal	Phalanger	intercastellanus	AM	S1892	47.69	-0.0275229
1	Arboreal	Phalanger	intercastellanus	AM	S1893	43.75	-0.0311987	2	-0.0293608
1	Arboreal	Phalanger	orientalis	AM	A11250	42.21	-0.0379735
1	Arboreal	Phalanger	orientalis	AM	M17206	42.95	-0.0379735	2	-0.0379735
1	Arboreal	Phalanger	sericeus	AM	M30752	61.14	-0.0220011	1	-0.0220011
1	Arboreal	Phascogale	tapoatafa	AM	M17983	31.16	-0.0147059
1	Arboreal	Phascogale	tapoatafa	AM	M7522	37.06	0.0273723	2	0.00633319
1	Arboreal	Phascolarctos	cinerus	MV	C22285	123.57	-0.0229227
1	Arboreal	Phascolarctos	cinerus	MV	C26355	106.69	-0.035676
1	Arboreal	Phascolarctos	cinerus	MV	C28651	136.44	-0.0377121
1	Arboreal	Phascolarctos	cinerus	MV	C28652	132.59	-0.0292288
1	Arboreal	Phascolarctos	cinerus	MV	C28655	128.14	-0.0268542
1	Arboreal	Phascolarctos	cinerus	MV	C28659	132.85	-0.0353318
1	Arboreal	Phascolarctos	cinerus	MV	C28659	141.24	-0.0512522
1	Arboreal	Phascolarctos	cinerus	MV	C28659	121.88	-0.0527817
1	Arboreal	Phascolarctos	cinerus	MV	C37640	138.66	-0.0342994
1	Arboreal	Phascolarctos	cinerus	MV	C6755	115.61	-0.0374203	10	-0.0363479
1	Arboreal	Pseudocheirus	occidentalis	WAM	M6783	49.56	-0.0384173
1	Arboreal	Pseudocheirus	occidentalis	WAM	M21025	57.8	-0.0243263	2	-0.0313718
1	Arboreal	Pseudocheirus	peregrinus	WAM	M9870	47.36	-0.0418718	1	-0.0418718
1	Arboreal	Trichosurus	caninus	AM	M33832	70.45	-0.022129
1	Arboreal	Trichosurus	caninus	AM	M35762	73.34	-0.0204262	2	-0.0212776
1	Arboreal	Trichosurus	vulpeculafuliginosus	MV	C10746	85.15	-0.0134223
1	Arboreal	Trichosurus	vulpeculafuliginosus	MV	C3208	69.8	-0.0255034
1	Arboreal	Trichosurus	vulpeculafuliginosus	MV	R3031	66.42	-0.0213575
1	Arboreal	Trichosurus	vulpeculafuliginosus	MV	R3037	66.2	-0.023224
1	Arboreal	Trichosurus	vulpeculafuliginosus	MV	R7371	84.27	-0.0185185
1	Arboreal	Trichosurus	vulpeculakerr	WAM	M6069	61.98	-0.0178147
1	Arboreal	Trichosurus	vulpeculavulpecula	WAM	M6595	50.11	-0.0199283
1	Arboreal	Trichosurus	vulpeculavulpecula	WAM	M6637	51.96	-0.0240214
1	Arboreal	Trichosurus	vulpeculavulpecula	WAM	M6646	54.82	-0.023416
1	Arboreal	Trichosurus	vulpeculavulpecula	WAM	M6658	50.48	-0.0202177	10	-0.0207424
2	Semiarboreal	Dasyurus	albopunctatus	AM	M23576	32.55	-0.032778
2	Semiarboreal	Dasyurus	albopunctatus	AM	M23604	32.81	0.0168341	2	-0.00797196
2	Semiarboreal	Dasyurus	maculatus	AM	A6379	75.81	0.0243872
2	Semiarboreal	Dasyurus	maculatus	AM	B5449	66.42	0.0168878
2	Semiarboreal	Dasyurus	maculatus	MV	C14717	73.32	-0.0109375
2	Semiarboreal	Dasyurus	maculatus	MV	C14717	82.68	-0.0261845
2	Semiarboreal	Dasyurus	maculatus	MV	C17696	81.5	-0.0116618
2	Semiarboreal	Dasyurus	maculatus	MV	C17727	76.63	-0.0102041
2	Semiarboreal	Dasyurus	maculatus	MV	C25985	72.79	0.0100902
2	Semiarboreal	Dasyurus	maculatus	MV	C26657	71.85	-0.0160256
2	Semiarboreal	Dasyurus	maculatus	MV	C35613	71.19	-0.0109375
2	Semiarboreal	Dasyurus	maculatus	MV	C5778	60.74	0.0196429
2	Semiarboreal	Dasyurus	maculatus	MV	C6108	55.36	0.0156491
2	Semiarboreal	Dasyurus	maculatus	AM	M11137	65.59	0.0157093
2	Semiarboreal	Dasyurus	maculatus	AM	M725	67.48	0.0400972
2	Semiarboreal	Dasyurus	maculatus	AM	M9798	61.94	0.0163265
2	Semiarboreal	Dasyurus	maculatus	AM	S1146	70.3	0.022093
2	Semiarboreal	Dasyurus	maculatus	AM	S1560	58.46	-0.0125986
2	Semiarboreal	Dasyurus	maculatus	AM	S1787	60.99	-0.0175213
2	Semiarboreal	Dasyurus	maculatus	AM	S497	59.07	0.0148649
2	Semiarboreal	Dasyurus	maculatus	AM	S498	55.99	0.0191233
2	Semiarboreal	Dasyurus	maculatus	AM	S879	62.66	0.0147649	20	0.00567827
3	Terrestrial	Dasycercus	cristicuda	SAM	M3706	30.99	0.0180879	1	0.0180879
3	Terrestrial	Dasyuroides	byrnei	AM	M7519	37.57	0.0169983
3	Terrestrial	Dasyuroides	byrnei	AM	M18284	35.55	0.0287512	2	0.0228747
3	Terrestrial	Dasyurus	geoffroii	WAM	M6797	55.58	0.0135656
3	Terrestrial	Dasyurus	geoffroii	WAM	M6735	49.06	0.00856531
3	Terrestrial	Dasyurus	geoffroii	AM	M6946	55.73	0.0130841
3	Terrestrial	Dasyurus	geoffroii	WAM	M19366	55.6	0.0183764
3	Terrestrial	Dasyurus	geoffroii	WAM	M6941	39.28	0.0651042
3	Terrestrial	Dasyurus	geoffroii	WAM	M6922	49.42	0.023918
3	Terrestrial	Dasyurus	geoffroii	WAM	M3491	54.23	0.0217126
3	Terrestrial	Dasyurus	geoffroii	WAM	M6582	53.66	0.0172329	8	0.0226949
3	Terrestrial	Dasyurus	hallacatus	WAM	M3651	40.98	0.0150094
3	Terrestrial	Dasyurus	hallacatus	WAM	M6966	38.9	0.0265957
3	Terrestrial	Dasyurus	hallacatus	WAM	M22480	43.63	0.0163969
3	Terrestrial	Dasyurus	hallacatus	WAM	M7863	39.68	-0.0162602
3	Terrestrial	Dasyurus	hallacatus	MV	C26501	37.08	0.0228907
3	Terrestrial	Dasyurus	hallacatus	MV	C684	42.9	-0.0152284
3	Terrestrial	Dasyurus	hallacatus	AM	M24653	36.9	0.0248156	7	0.0106028
3	Terrestrial	Dasyurus	viverrinus	MV	R2368	40.65	0.0224761
3	Terrestrial	Dasyurus	viverrinus	MV	C31527	66.34	-0.0234622
3	Terrestrial	Dasyurus	viverrinus	MV	C17714	52.84	0.0342951
3	Terrestrial	Dasyurus	viverrinus	MV	C6080	45.03	0.0213675
3	Terrestrial	Dasyurus	viverrinus	AM	M2086	43.07	-0.0161109
3	Terrestrial	Dasyurus	viverrinus	AM	M7222	44.42	0.0293681
3	Terrestrial	Dasyurus	viverrinus	AM	M1698	51.41	0.0182503	7	0.012312
3	Terrestrial	Echymipera	kalubu	AM	M24591	30.47	-0.0338028
3	Terrestrial	Echymipera	kalubu	AM	M24590	32.9	-0.021164	2	-0.0274834
3	Terrestrial	Isoodon	auratusbarrowensis	WAM	M19076	27.41	0.0372327	1	0.0372327
3	Terrestrial	Isoodon	macrourus	WAM	M15824	42.54	-0.0104347
3	Terrestrial	Isoodon	macrourus	WAM	M22082	45.11	0.0255929
3	Terrestrial	Isoodon	macrourus	WAM	M19872	33.37	0.0410618	3	0.01874
3	Terrestrial	Isoodon	obesulus	AM	M11135	26.16	0.0332382
3	Terrestrial	Isoodon	obesulus	WAM	M6929	38.09	0.0403138
3	Terrestrial	Isoodon	obesulus	WAM	M6560	37.84	0.0177778	3	0.0304433
3	Terrestrial	Lasiorhinus	latifrons	MV	C22355	93.44	-0.0160428
3	Terrestrial	Lasiorhinus	latifrons	MV	C22340	91.35	-0.0197766
3	Terrestrial	Lasiorhinus	latifrons	MV	C6708	82.96	-0.0647482	4	-0.0290935
3	Terrestrial	Macrotis	lagotis	WAM	M14370	45.56	-0.012423	1	-0.012423
3	Terrestrial	Microperorycytes	longicauda	AM	M37996	25.61	0.0238035	1	0.0238035
3	Terrestrial	Myrmecobius	fasciatus	WAM	M40551	32.21	0.0305677	1	0.0305677
3	Terrestrial	Perameles	gunnii	MV	C8188	40.17	0.0289135
3	Terrestrial	Perameles	gunnii	MV	C21584	34.67	0.0209424
3	Terrestrial	Perameles	gunnii	MV	C32881	41.87	0.0338983	3	0.0279181
3	Terrestrial	Perameles	nasuta	MV	C35943	32.72	0.0528967
3	Terrestrial	Perameles	nasuta	MV	C18497	28.07	0.0198822
3	Terrestrial	Perameles	nasuta	MV	C26608	36.09	0.0362812
3	Terrestrial	Perameles	nasuta	MV	C7772	40.07	0.0392157
3	Terrestrial	Perameles	nasuta	AM	M8994	41.09	0.030069
3	Terrestrial	Perameles	nasuta	AM	S1073	38.36	-0.0306748
3	Terrestrial	Perameles	nasuta	AM	S1074	43.32	0.0222633
3	Terrestrial	Perameles	nasuta	AM	M11238	44.46	0.0136774
3	Terrestrial	Perameles	nasuta	AM	M32983	43.71	-0.0373065
3	Terrestrial	Perameles	nasuta	AM	S1065	39.18	0.0472441
3	Terrestrial	Perameles	nasuta	AM	M35409	32.37	0.03125
3	Terrestrial	Perameles	nasuta	AM	M33610	34.71	0.0284647
3	Terrestrial	Perameles	nasuta	AM	M35408	33.46	0.0240055
3	Terrestrial	Perameles	nasuta	AM	S1072	39.92	0.0107554	14	0.0205731
3	Terrestrial	Phalanger	gymnotis	AM	M21907	48.57	-0.0537822	1	-0.0537822
3	Terrestrial	Sarcophilus	harrisii	MV	C6233	85.49	0.0136205
3	Terrestrial	Sarcophilus	harrisii	MV	R8192	81.77	0.0182791
3	Terrestrial	Sarcophilus	harrisii	MV	R8192	96.31	0.0186782
3	Terrestrial	Sarcophilus	harrisii	MV	C6256	75.68	0.0299296
3	Terrestrial	Sarcophilus	harrisii	MV	C6245	86.09	0.00987609
3	Terrestrial	Sarcophilus	harrisii	MV	R2993	71.44	0.0215264
3	Terrestrial	Sarcophilus	harrisii	MV	R1552	68.71	0.019469
3	Terrestrial	Sarcophilus	harrisii	WAM	M17183	90.75	0.0392927
3	Terrestrial	Sarcophilus	harrisii	WAM	M16593	98.06	0.0220935
3	Terrestrial	Sarcophilus	harrisii	WAM	M16592	103.37	0.022204
3	Terrestrial	Sarcophilus	harrisii	WAM	M8336	99.11	0.0172684	11	0.0211125
3	Terrestrial	Thylocinus	cynocephalus	AM	M1959	155.67	0.0514714	1	0.0514714
3	Terrestrial	Lasiorhinus	latifrons	WAM	M6913	65.11	-0.0158065
3	Terrestrial	Vombatus	ursinus	WAM	M55232	89.52	-0.00938086
3	Terrestrial	Vombatus	ursinus	MV	C6652	67.71	0.02079
3	Terrestrial	Vombatus	ursinus	MV	C9479	82.99	0.0210526
3	Terrestrial	Vombatus	ursinus	MV	C9480	95.19	0.0280166	4	0.0151196
								161

## Sheet: species means
		Corrected as in table 1			Ulnar data means for 41 marsupial species						body mass
		genus		Loco	Locomotion	Genus	Species	n	Curvature	Loco	min	max	mean	abs curve
Dactylopsila megalura		Dactylopsila	magalura
Dactylopsila trivigata		Dactylopsila	trivigata		Arboreal	Dactylopsila	trivigata	1	-0.0221328	1	0.246	0.39	0.318	0.0221328
Dendrolagus bennettianus		Dendrolagus	bennettianus		Arboreal	Dendrolagus	bennettianus	1	-0.0359043	1	6.7	10	8.35	0.0359043
Dendrolagus lumholtzi		Dendrolagus	lumholtzi		Arboreal	Dendrolagus	lumholtzi	3	-0.0380993	1	6.7	10	8.35	0.0380993
Dendrolagus matschiei		Dendrolagus	matschiei		Arboreal	Dendrolagus	matschiei	1	-0.0339734	1	6.7	10	8.35	0.0339734
Didelphys californica		Didelphis	virginiana		Arboreal	Didelphys	californica	1	-0.0121365	1	2	5.5	3.75	0.0121365
Gymnobelideus leadbeateri		Gymnobelideus	leadbeateri		Arboreal	Gymnobelideus	leadbeateri	1	-0.0318841	1	0.065	0.12	0.0925	0.0318841
Petauroides volans		Petauroides	volans		Arboreal	Petauroides	volans	8	0.0113306	1	1.2	1.5	1.35	0.0113306
Petaurus australis		Petaurus	australis		Arboreal	Petaurus	australis	2	-0.0280637	1	0.435	0.7	0.5675	0.0280637
Petaurus norfolcensis		Petaurus	norfolcensis		Arboreal	Petaurus	norfolcensis	12	-0.0131884	1	0.435	0.7	0.5675	0.0131884
Phalanger maculatus		Phalanger	maculatus		Arboreal	Phalanger	maculatus	1	-0.0423899	1	3	7	5	0.0423899
Phalanger carmelitae		Phalanger	carmelitae		Arboreal	Phalanger	carmelitae	1	-0.0278491	1	1	1.88	1.44	0.0278491
Phalanger intercastellanus		Phalanger	mimicus		Arboreal	Phalanger	intercastellanus	2	-0.0293608	1	1	1.88	1.44	0.0293608
Phalanger orientalis		Phalanger	orientalis		Arboreal	Phalanger	orientalis	2	-0.0379735	1	1	1.88	1.44	0.0379735
Phalanger sericeus		Phalanger	sericeus		Arboreal	Phalanger	sericeus	1	-0.0220011	1	1	1.88	1.44	0.0220011
Phascogale tapoatafa		Phascogale	tapoatafa		Arboreal	Phascogale	tapoatafa	2	0.00633319	1	0.1	0.23	0.165	0.00633319
Phascolarctos cinerus		Phascolarctos	cinerus		Arboreal	Phascolarctos	cinerus	10	-0.0363479	1	4	15	9.5	0.0363479
Pseudocheirus occidentalis		Pseudocheirus	occidentalis		Arboreal	Pseudocheirus	occidentalis	2	-0.0313718	1	0.7	1.5	1.1	0.0313718
Pseudocheirus peregrinus		Pseudocheirus	peregrinus		Arboreal	Pseudocheirus	peregrinus	1	-0.0418718	1	0.7	1.5	1.1	0.0418718
Trichosurus caninus		Trichosurus	caninus		Arboreal	Trichosurus	caninus	2	-0.0212776	1	1.3	5	3.15	0.0212776
Trichosurus vulpecula		Trichosurus	vulpecula		Arboreal	Trichosurus	vulpeculavulpecula	10	-0.0207424	1	1.3	5	3.15	0.0207424
Dasyurus albopunctatus		Dasyurus	albopunctatus		Semiarboreal	Dasyurus	albopunctatus	2	-0.00797196	2	0.4	0.6	0.5	0.00797196
Dasyurus maculatus		Dasyurus	maculatus		Semiarboreal	Dasyurus	maculatus	20	0.00567827	2	2	3	2.5	0.00567827
Dasycercus cristicuda		Dasycercus	cristicuda		Terrestrial	Dasycercus	cristicuda	1	0.0180879	3	0.06	0.17	0.115	0.0180879
Dasyuroides byrnei		Dasyuroides	byrnei		Terrestrial	Dasyuroides	byrnei	2	0.0228747	3	0.07	0.14	0.105	0.0228747
Dasyurus geoffroii		Dasyurus	geoffroii		Terrestrial	Dasyurus	geoffroii	8	0.0226949	3	0.45	0.65	0.55	0.0226949
Dasyurus hallacatus		Dasyurus	hallacatus		Terrestrial	Dasyurus	hallacatus	7	0.0106028	3	0.4	0.6	0.5	0.0106028
Dasyurus viverrinus		Dasyurus	viverrinus		Terrestrial	Dasyurus	viverrinus	7	0.012312	3	0.6	1.55	1.075	0.012312
Echymipera kalubu		Echymipera	kalubu		Terrestrial	Echymipera	kalubu	2	-0.0274834	3	0.5	2	1.25	0.0274834
Isoodon auratus barrowensis		Isoodon	auratus		Terrestrial	Isoodon	auratusbarrowensis	1	0.0372327	3	1.1	1.4	1.25	0.0372327
Isoodon macrourus		Isoodon	macrourus		Terrestrial	Isoodon	macrourus	3	0.01874	3	1.2	1.6	1.4	0.01874
Isoodon obesulus fusciventer		Isoodon	obesulus		Terrestrial	Isoodon	obesulus	3	0.0304433	3	1.1	1.4	1.25	0.0304433
Lasiorhinus latifrons		Lasiorhinus	latifrons		Terrestrial	Lasiorhinus	latifrons	4	-0.0290935	3	19	32	25.5	0.0290935
Macrotis lagotis		Macrotis	lagotis		Terrestrial	Macrotis	lagotis	1	-0.012423	3	0.3	1.6	0.95	0.012423
Microperorycytes longicauda		Peroryctes	longicauda		Terrestrial	Microperorycytes	longicauda	1	0.0238035	3	0.38	0.45	0.415	0.0238035
Myrmecobius fasciatus		Myrecobius	fasciatus		Terrestrial	Myrmecobius	fasciatus	1	0.0305677	3	0.275	0.45	0.3625	0.0305677
Perameles gunnii		Perameles	gunnii		Terrestrial	Perameles	gunnii	3	0.0279181	3	0.45	0.9	0.675	0.0279181
Perameles nasuta		Perameles	nasuta		Terrestrial	Perameles	nasuta	14	0.0205731	3	0.85	1.1	0.975	0.0205731
Phalanger gymnotis		Phalanger	gymnotis		Terrestrial	Phalanger	gymnotis	1	-0.0537822	3	1.46	4	2.73	0.0537822
Sarcophilus harrisii		Sarcophilus	harrisii		Terrestrial	Sarcophilus	harrisii	11	0.0211125	3	4.1	11	7.55	0.0211125
Thylocinus cynocephalus		Thylocinus	cynocephalus		Terrestrial	Thylocinus	cynocephalus	1	0.0514714	3	10	16	13	0.0514714
Vombatus ursinus		Vombatus	ursinus		Terrestrial	Vombatus	ursinus	4	0.0151196	3	15	35	25	0.0151196
								41
